# Supplementary material for: Endosomal phosphatidylinositol 3‐phosphate controls synaptic vesicle cycling and neurotransmission
Source: PubMed Central journal article supplement (PMC9058544; doi:10.15252/embj.2021109352), 2022-03-22
Supplement: EMBJ-41-e109352-s004.pdf [file EMBJ-41-e109352-s004.pdf]

## Expanded View Figures

### Figure EV1. PI(3)P is localized at neuronal soma and synapses and endosomal PI(3)P levels are regulated by neuronal activity.

- A Subcellular fractionation of mouse brains followed by western blot reveals the presence of Class II and Class III PI3Ks in the synaptic vesicle enriched LP2 fraction.
- B Representative 2-color confocal images of cultured hippocampal neurons treated with DMSO (0.1%) or VPS34IN1 (10  $\mu$ M) for 1 h, fixed and stained for MAP2, synaptophysin (Syp), and PI(3)P. Arrows indicate presynaptic terminals that contain (DMSO) or lack (VPS34IN1) PI(3)P. Scale bar, 10  $\mu$ m.
- C, D Representative 3-color STED images of synapses of cultured hippocampal neurons treated with DMSO (0.1%) or VPS34IN1 (10  $\mu$ M) for 1 h, fixed and stained for PI(3)P and VGlut1-PSD95 pair (markers for excitatory synapses) in C and VGAT-Gephyrin pair (markers for inhibitory synapses) in D. Scale bar, 0.5  $\mu$ m. Both excitatory and inhibitory synaptic terminals contain PI(3)P-positive structures, which disappear upon VPS34 inhibition.
- E Cultured hippocampal neurons treated with Gabazine (10  $\mu$ M) overnight, fixed and stained for MAP2, Syp and PI(3)P. Scale bar, 10  $\mu$ m.
- F Cultured hippocampal neurons were treated with Roscovitine (10  $\mu$ M) for 1 h and field-stimulated with four trains of 200 APs (40 Hz, 5 s; 90 s gap between each train) (Stim) or left unstimulated (–), fixed and stained for MAP2, Syp, and PI(3)P. Scale bar, 10  $\mu$ m.
- G Cultured hippocampal neurons were treated with Dinaciclib (10  $\mu$ M) for 1 h and field-stimulated with four trains of 200 APs (40 Hz, 5 s; 90 s gap between each train) (Stim) or left unstimulated (–), fixed and stained for MAP2, Syp, and PI(3)P. Scale bar, 10  $\mu$ m.
- H Relative intensity of PI(3)P in neuronal somata (MAP2<sup>+</sup>) or synapses (Syp<sup>+</sup>) of cultured hippocampal neurons were treated with Dinaciclib (10  $\mu$ M) for 1 h and field-stimulated with four trains of 200 APs (40 Hz, 5 s; 90 s gap between each train) (Stim) or left unstimulated (–).  $N = 3$  independent experiments ( $\geq 15$  images per condition); Mean  $\pm$  SEM; \* $P < 0.05$ ; Two-way ANOVA.
- I Cultured hippocampal neurons transfected with VPS34-SNAP or VPS34<sup>T159A</sup>-SNAP at DIV7, treated with Gabazine (10  $\mu$ M) overnight at DIV13, treated 1 h with SNAP-tag ligand JF646 to label VPS34-SNAP at DIV14 and subsequently fixed and stained for PI(3)P. Scale bar, 10  $\mu$ m.
- J Relative intensity of PI(3)P in neuronal somata of cultured hippocampal neurons expressing VPS34-SNAP or VPS34<sup>T159A</sup>-SNAP, treated with DMSO or Gabazine (10  $\mu$ M) overnight.  $N = 6$  independent experiments ( $\geq 30$  images per condition); Mean  $\pm$  SEM; \* $P < 0.05$ ; Two-way ANOVA.

Source data are available online for this figure.

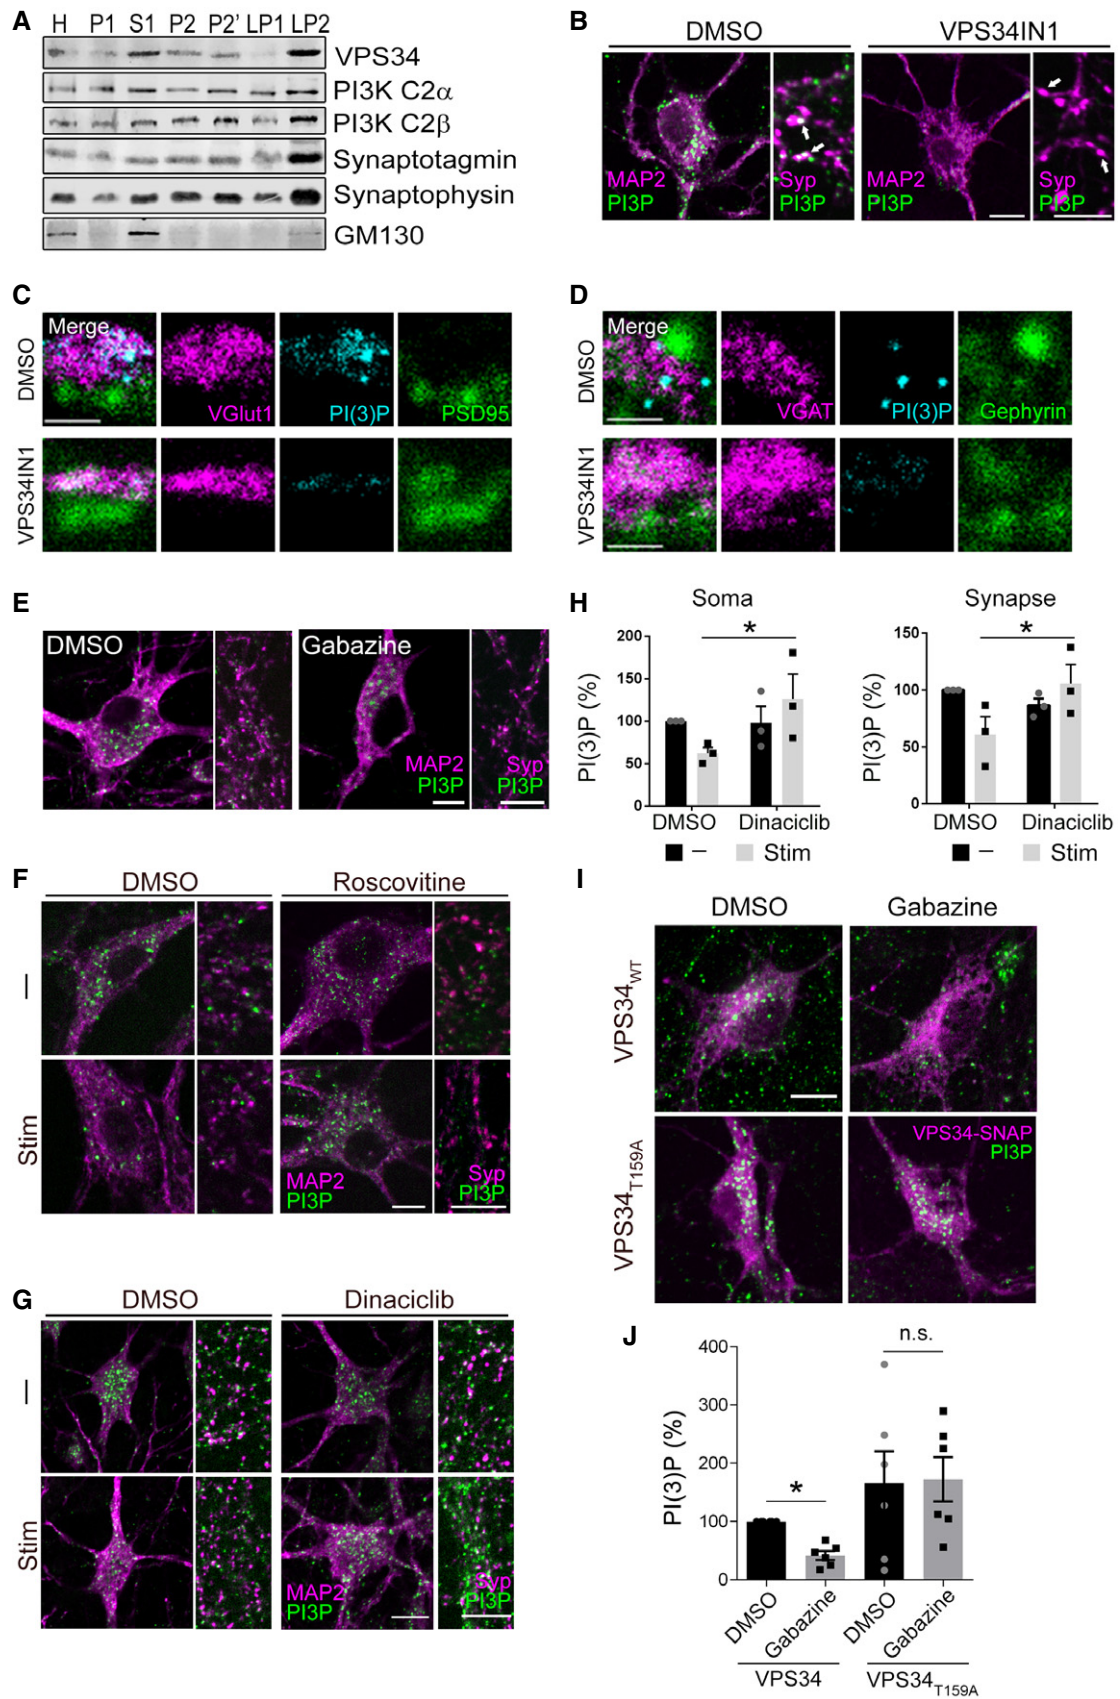

Figure EV1.

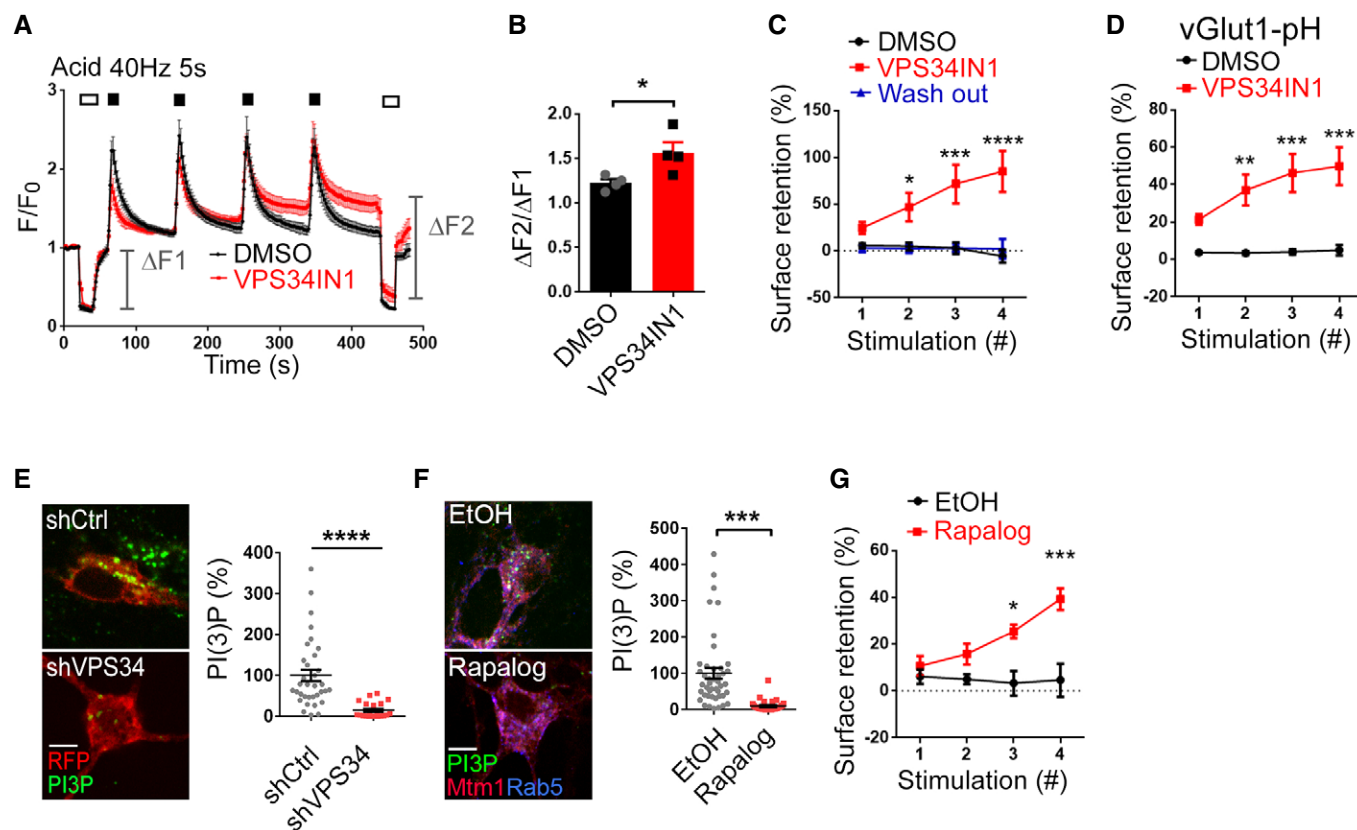

**Figure EV2. PI(3)P depletion inhibits SV endocytosis monitored by Synaptophysin-pHluorin.**

- A Normalized Synaptophysin-pHluorin responses in cultured hippocampal neurons stimulated with four trains of 200 APs (40 Hz, 5 s) with 90 s intervals after 1 h pretreatment with DMSO or VPS34IN1 (10  $\mu$ M) and subjected to low pH image buffer (Acid) before and after the stimulation trains.
- B The ratio of surface fluorescence of Synaptophysin-pHluorin before and after 4  $\times$  200 APs stimulation in DMSO- and VPS34IN1-treated neurons. Mean  $\pm$  SEM; 15 images per condition from 4 independent experiments; \* $P$  < 0.05; Student's  $t$ -test.
- C Surface retention of Synaptophysin-pHluorin 90 s poststimulus is plotted for each of the four successive 200 AP stimulation trains in neurons treated with VPS34IN1 (10  $\mu$ M, 1 h) and washed overnight with conditioned medium. Mean  $\pm$  SEM;  $\geq$  11 images per condition from 3 independent experiments; \* $P$  < 0.05; \*\*\* $P$  < 0.001; \*\*\*\* $P$  < 0.0001; Two-way ANOVA.
- D Surface retention of vGlut1-pHluorin 90 s poststimulus plotted for each 200 AP stimulation (40 Hz, 5 s) in neurons treated with VPS34IN1 (10  $\mu$ M, 1 h). Mean  $\pm$  SEM;  $\geq$  15 images per condition from 3 independent experiments; \*\* $P$  < 0.01; \*\*\* $P$  < 0.001; Two-way ANOVA.
- E Cultured hippocampal neurons transfected with mRFP and control shRNA or shRNA against VPS34, stained for PI(3)P. Scale bar, 10  $\mu$ m. Mean  $\pm$  SEM;  $n$  = 34 (shCtrl) and  $n$  = 21 (shVPS34); \*\*\*\* $P$  < 0.0001; Student's  $t$ -test.
- F Confocal images of cultured hippocampal neurons transfected with mRFP-FKBP-hMTM1 and FRB\*-iRFP-Rab5, treated with EtOH or Rapalog and stained for PI(3)P. Scale bar, 10  $\mu$ m. Mean  $\pm$  SEM;  $\geq$  35 images per condition; \*\*\* $P$  < 0.001; Student's  $t$ -test.
- G Surface retention of Synaptophysin-pHluorin 90 s poststimulus is plotted for each of the four successive 200 AP stimulation trains in hippocampal neurons expressing mRFP-FKBP-hMTM1 and FRB\*-iRFP-Rab5 and treated with EtOH or Rapalog. Mean  $\pm$  SEM;  $\geq$  13 images per condition from 3 independent experiments; \* $P$  < 0.05; \*\*\* $P$  < 0.001; Two-way ANOVA.

Source data are available online for this figure.

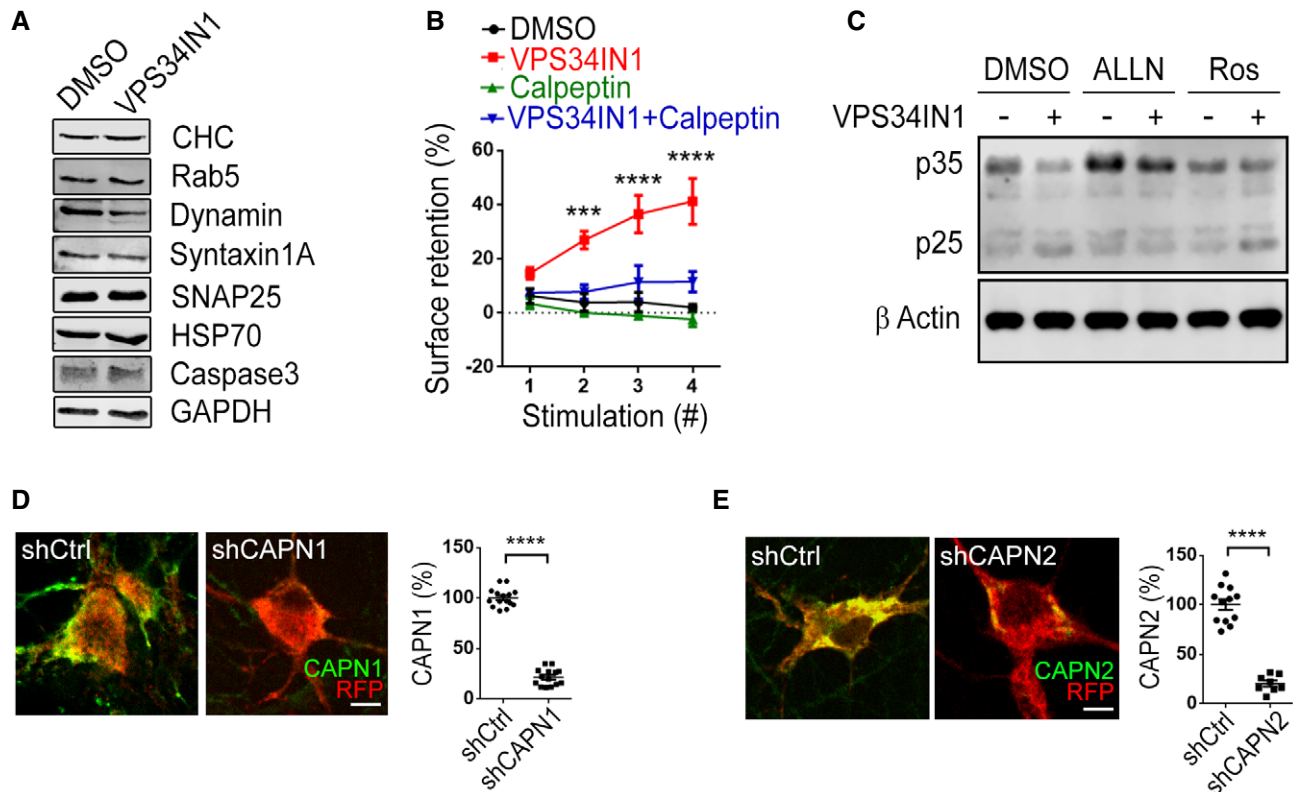

**Figure EV3. PI(3)P loss inhibits SV endocytosis via calpain 2 activation.**

- A Levels of various synaptic proteins in DMSO (0.1%) and VPS34IN1 (10  $\mu$ M) treated cultured cerebellar granule neurons analyzed by western blot.
- B Surface retention of Synaptophysin-pHluorin 90 s poststimulus is plotted for each of the four successive stimulation trains in neurons treated with VPS34IN1 (10  $\mu$ M) and Calpeptin (10  $\mu$ M). Mean  $\pm$  SEM;  $\geq$  9 images per condition from 3 independent experiments; \*\*\* $P$  < 0.001; \*\*\*\* $P$  < 0.0001; Two-way ANOVA.
- C Processing of p35 to p25 in cultured hippocampal neurons treated with VPS34IN1 (10  $\mu$ M) for 1 h, analyzed by western blot. Cleavage of p35 to p25 was reduced in neurons simultaneously treated with ALLN (100  $\mu$ M) but not with Roscovitine (Ros, 10  $\mu$ M).
- D, E Cultured hippocampal neurons were cotransfected with an mRFP expression plasmid and shCtrl, shCAPN1, or shCAPN2 and stained for Calpain 1 in D or Calpain 2 in E. Scale bar, 10  $\mu$ m. The relative mean fluorescence intensity is plotted.  $\geq$  8 images per condition; \*\*\*\* $P$  < 0.0001; Student's  $t$ -test.

Source data are available online for this figure.

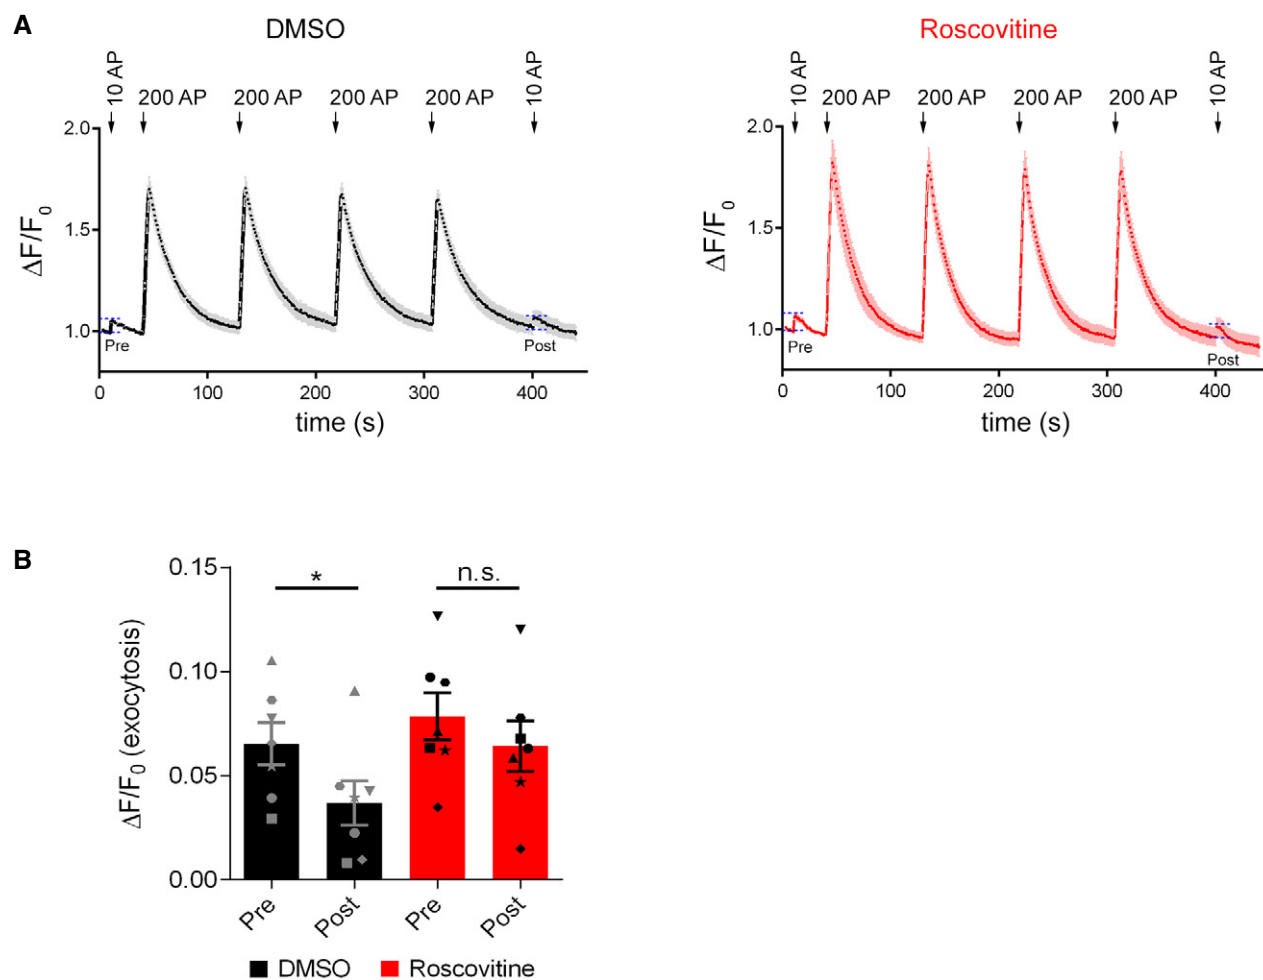

**Figure EV4. Repetitive high frequency stimulation reduces the responsiveness of synapses to mild physiological stimulation in a Cdk5-dependent manner.**

**A** Normalized Synaptophysin-pHluorin responses in cultured hippocampal neurons treated with DMSO (0.1%, left) or Roscovitine (10  $\mu$ M; right) stimulated with 10 APs (40 Hz, 0.25 s), 4  $\times$  200 APs (40 Hz, 5 s), and 10 APs (40 Hz, 0.25 s). The 10 AP stimulations before and after the train of 200 AP stimulations were labeled pre and post, respectively.

**B** The amplitude of SV release detected by measuring the increase in Synaptophysin-pHluorin fluorescence in response to 10 AP before (pre) and after (post) high frequency stimulation (4  $\times$  200 APs) as indicated by dashed lines in A. Repetitive high frequency stimulation reduces SV release, an effect occluded by Cdk5 inhibition. Mean  $\pm$  SEM;  $N = 7$  independent experiments; \* $P < 0.05$ ; One-way ANOVA; Tukey's Multiple Comparison Test.

Source data are available online for this figure.

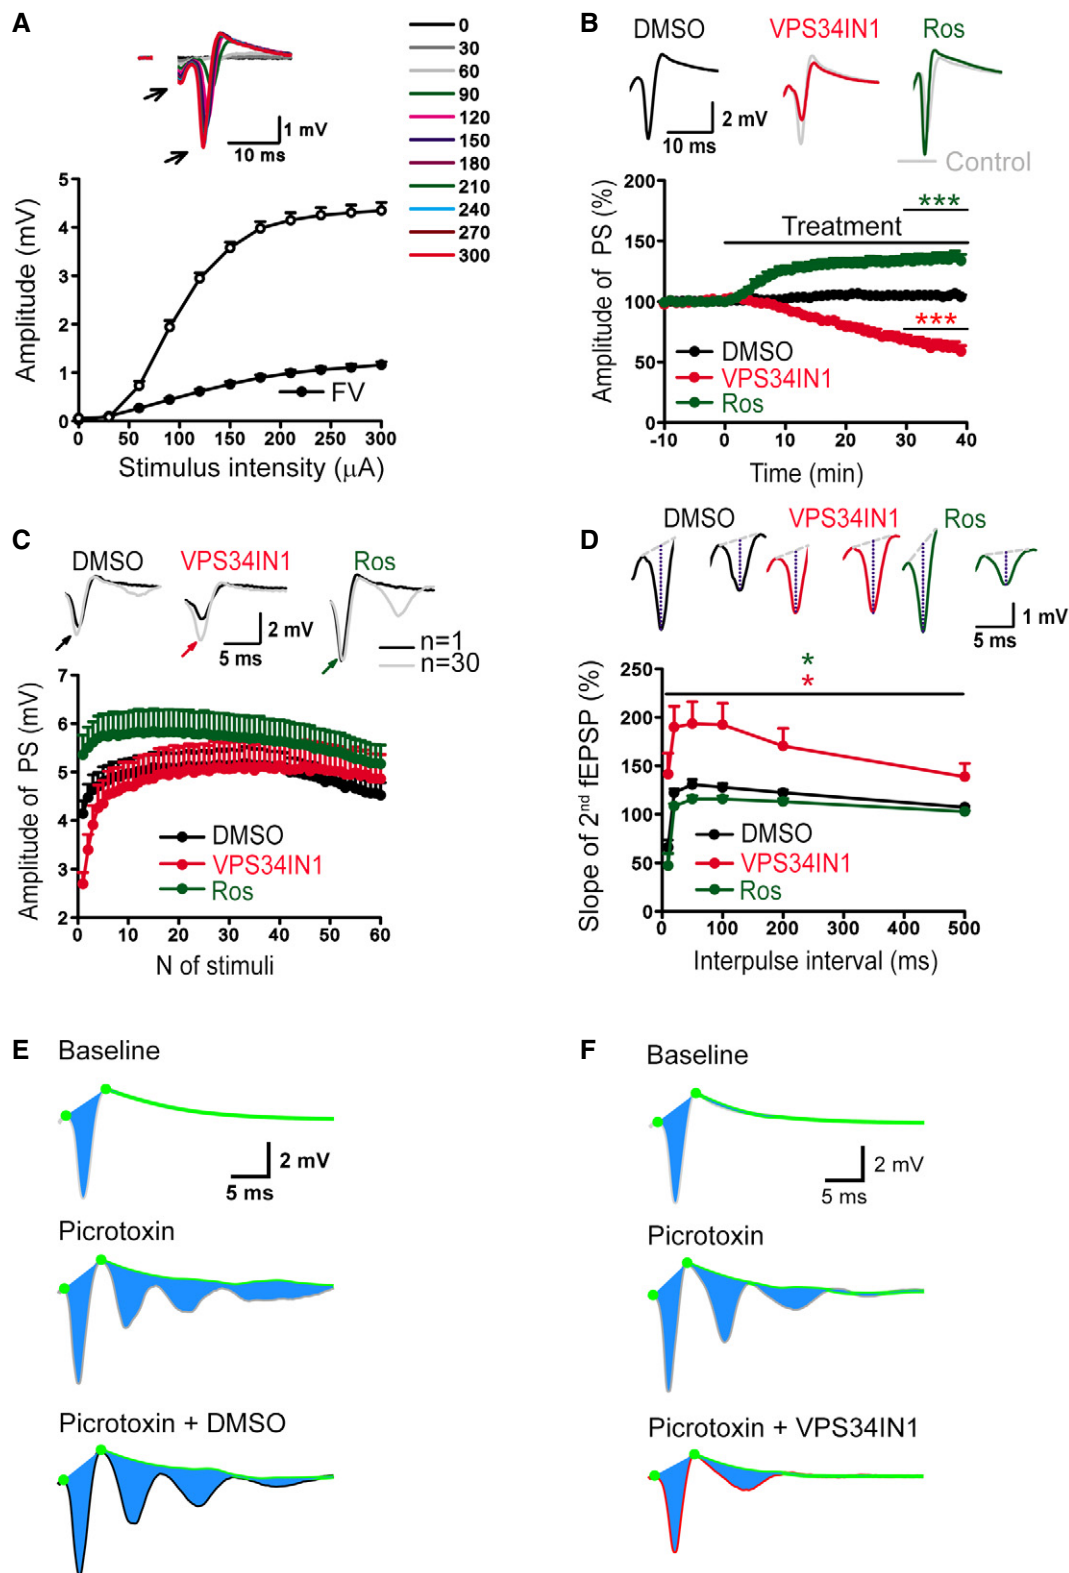

Figure EV5.

**Figure EV5. Effects of pharmacological inhibition of VPS34 and Cdk5 on hippocampal network activity.**

- A Input/output relationships between stimulus intensities and amplitudes of population spikes (PS) or fiber volleys (FV) show normal basal excitability of neuronal populations in CA1 *stratum pyramidale*. Insert sample (above) shows representative PS responses evoked by increasing stimulation strength (from 0 to 300  $\mu$ A with a 30  $\mu$ A step). Mean  $\pm$  SEM; 36 slices from 12 mice.
- B Recordings of PS over time did not show significant changes in PS amplitudes in the presence of DMSO (0.03%). PS amplitude is reduced in the presence of VPS34IN1 (3  $\mu$ M) and facilitated in the presence of Roscovitine (10  $\mu$ M). Insert samples (above) show the average of 30 subsequent PSs before (from -10 to 0 min) and after (from 30 to 40 min) pharmacological treatments. Mean  $\pm$  SEM; six slices per condition from six animals; \*\*\* $P$  < 0.001; One-way ANOVA.
- C Measurement of activity-dependent facilitation of PSs. DMSO (0.03%) does not affect the facilitation of PS amplitudes during 1 Hz stimulation. VPS34IN1 treatment led to stronger facilitation of PS amplitudes, whereas facilitation was less pronounced in the presence of Roscovitine. Note that under all conditions 1 Hz stimulation eventually increased PS amplitudes to nearly identical maximal levels. Top panels show representative traces N1 (i.e., 1<sup>st</sup> stimulus response) and N30 (i.e., 30<sup>th</sup> stimulus response) with PS peaks indicated by color-coded arrows. Mean  $\pm$  SEM; 12 slices per condition from 12 animals.
- D Recordings of paired-pulse modulation of PS at different interpulse intervals (from 10 to 500 ms). VPS34IN1 led to an elevated paired-pulse ratio of PSs compared to DMSO, whereas Roscovitine reduced it. Mean  $\pm$  SEM; 12 slices per condition from 12 animals; \* $P$  < 0.05; Two-way ANOVA.
- E, F Representative traces show baseline averages of 30 traces before treatment (-10 to 0 min, top), after picrotoxin (50  $\mu$ M) application (20-30 min, middle) and following treatment with DMSO or VPS34IN1 (60-70 min, bottom).

Source data are available online for this figure.
