# Supplementary material for: Endosomal phosphatidylinositol 3‐phosphate controls synaptic vesicle cycling and neurotransmission
Source: PubMed Central journal article supplement (PMC9058544; doi:10.15252/embj.2021109352), 2022-03-22
Supplement: EMBJ-41-e109352-s011.pdf [file EMBJ-41-e109352-s011.pdf]

Appendix  
for

**Endosomal phosphatidylinositol 3-phosphate levels control presynaptic  
vesicle cycling and neurotransmission**

Guan-Ting Liu, Gaga Kochlamazashvili, Dmytro Puchkov, Rainer Müller, Carsten Schultz,  
Albert I. Mackintosh, Dennis Vollweiter, Volker Haucke\*, Tolga Soykan\*

Correspondence to: soykan@fmp-berlin.de (T.S.) or haucke@fmp-berlin.de (V.H.)

This file includes:

Appendix Figure S1

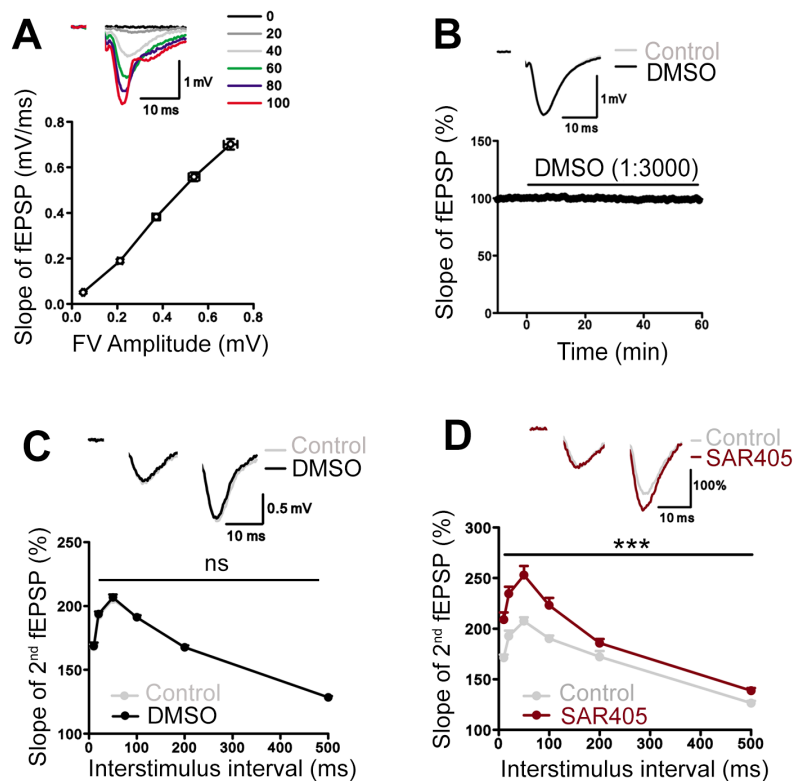

**Appendix Figure S1. Pharmacological depletion of PI(3)P synthesis via VPS34 increases basal synaptic transmission.**

A Input/output relationships between presynaptic fiber volleys and slopes of fEPSPs show normal basal excitatory synaptic transmission in slices from C57BL/6J mice. Insert samples show fEPSPs representing responses evoked by increasing stimulation strength (from 0 to 100  $\mu$ A with a 20  $\mu$ A step). A total of 42 slices from 22 animals.

B Basal synaptic transmission of CA3-CA1 connections in the acute hippocampal slices show no changes after DMSO (0.03%) treatment. Insert samples show the average of 30 consecutive fEPSPs before (-10 to 0 min) and after DMSO treatment (50 to 60 min). The mean slopes of fEPSPs recorded 10 min before treatment was taken as 100%. Mean  $\pm$  SEM; 18 slices from 18 animals.

C Measurements of paired-pulse facilitation (PPF) with different interstimulus intervals (10 to 500 ms) show no change in the slope of the second fEPSP following DMSO application (0.03%). Mean  $\pm$  SEM; 18 slices from 18 animals; n.s not significant; Two-way RM ANOVA.

D Measurements of PPF with different interstimulus intervals in CA3-CA1 connections of acute slices treated with SAR405 (20  $\mu$ M). Representative fEPSP traces with 20 ms intervals before and after application of SAR405 (above) and the relative slope of 2<sup>nd</sup> fEPSP with different interstimulus intervals (below) are shown. SAR405 application leads to a significant facilitation of the second fEPSP, indicating a lower initial release probability. Mean  $\pm$  SEM; 6 slices per condition from 4 animals; \*\*\* $p$  < 0.001; Two-way ANOVA.
